# Supplementary material
Source: PubMed Central journal article supplement (PMC4407213)
Supplement: AEM.04194-14_zam999116247so1.pdf [file AEM.04194-14_zam999116247so1.pdf]

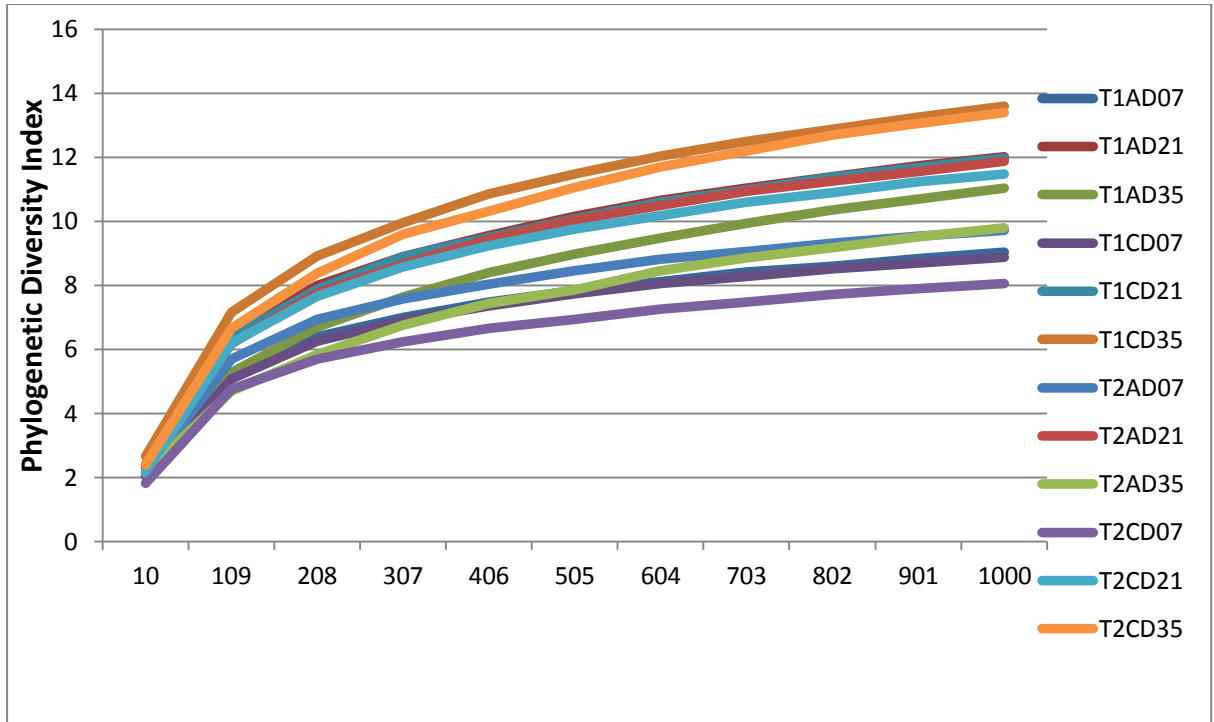

1

2

**Figure S1.** Megan 4 Analysis. Pylogenetic diveristy index average over 12 samples per

3

timepoint and treatment.

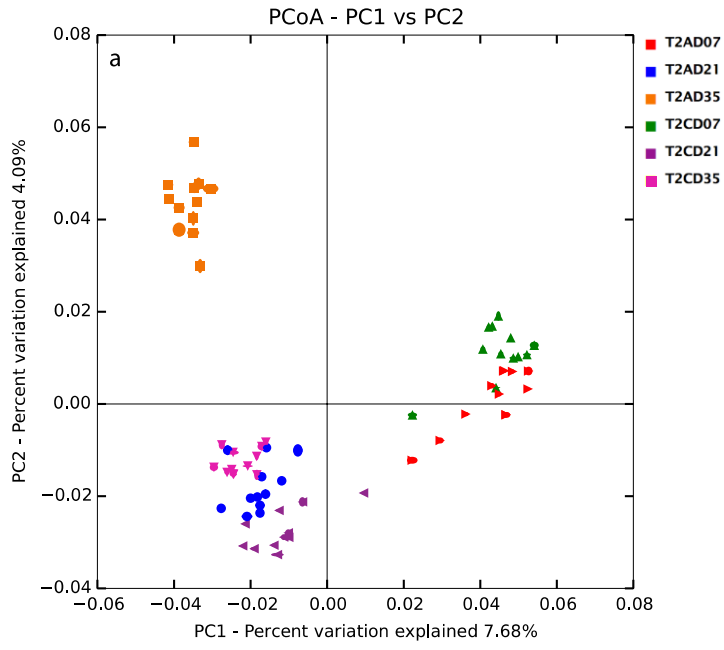

4

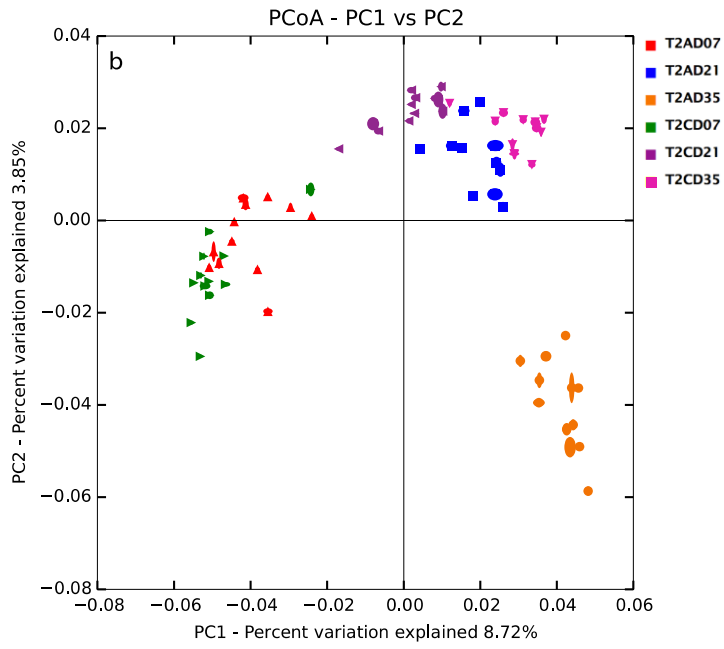

5

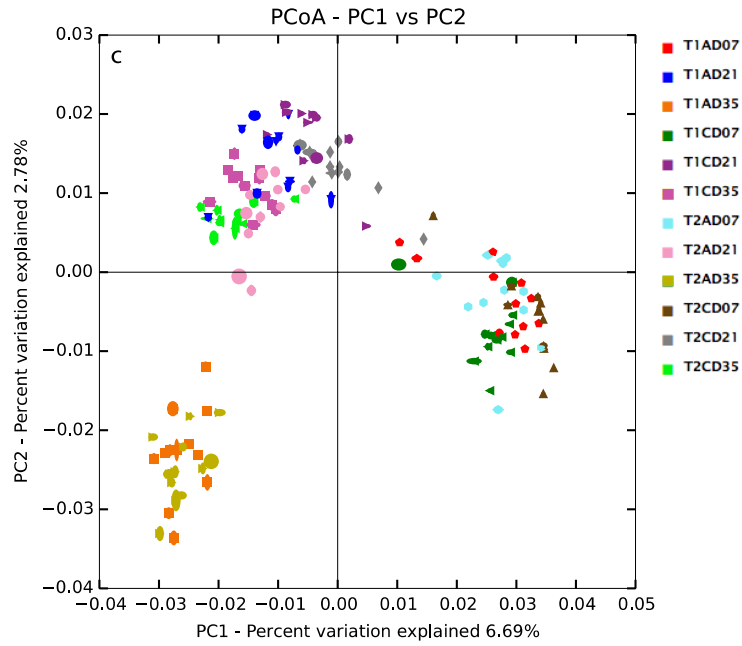

6

7 **Figure S2 (a-c).** PCA analysis (a= Trial 1, b=Trial 2, c=Trial 1 and Trial 2 combined)

8 was performed on pairwise distance estimates obtained from Unweighted Unifrac

9 analysis to assess for differences between Timepoints (D07 = day 7, D21 = day 21 and

10 D35 = day 35 posthatch) and Treatment (A = Actigen, C = Control).

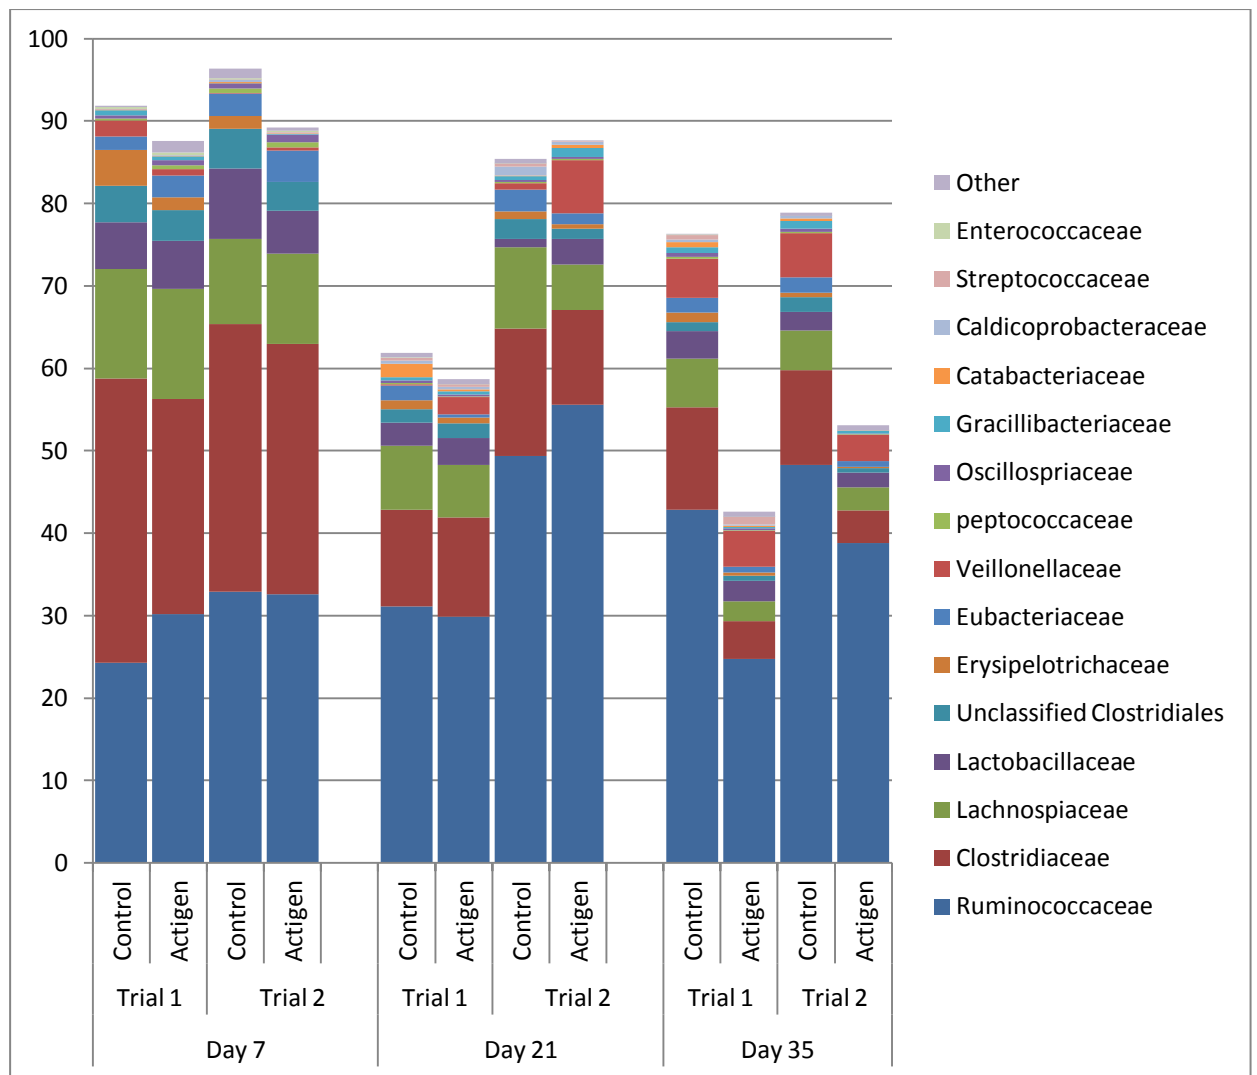

11

12

13

14

**Figure S3.** Bacterial Family level distribution (percentage) within Firmicutes phylum at each timepoint in control and supplemented groups for both Trial 1 and Trial 2, (n=12 for each treatment per timepoint).

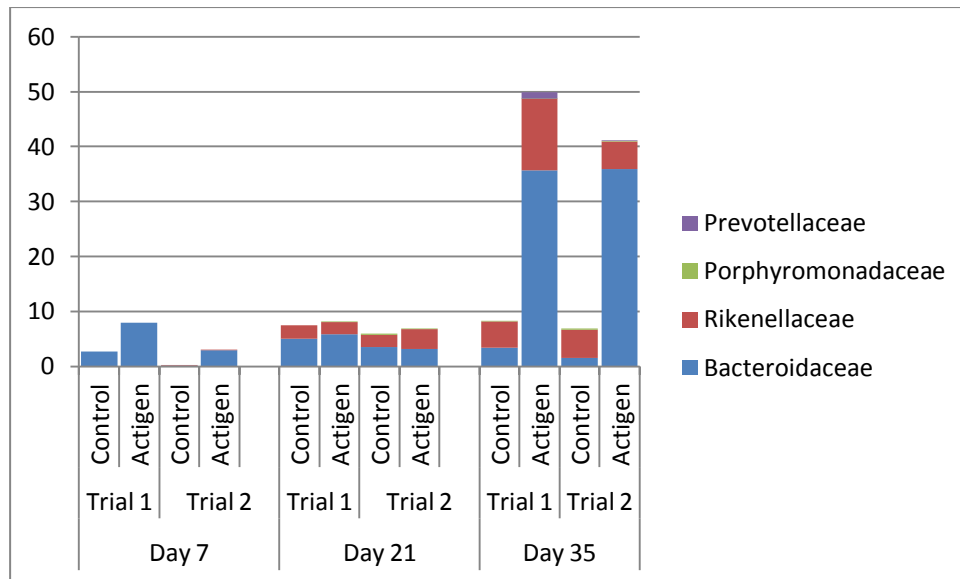

15

16

**Figure S4.** Bacterial Family level distribution (percentage) within Bacteroidetes phylum

17

at each timepoint in control and supplemented groups for both Trial 1 and Trial 2, (n=12

18

for each treatment per timepoint).

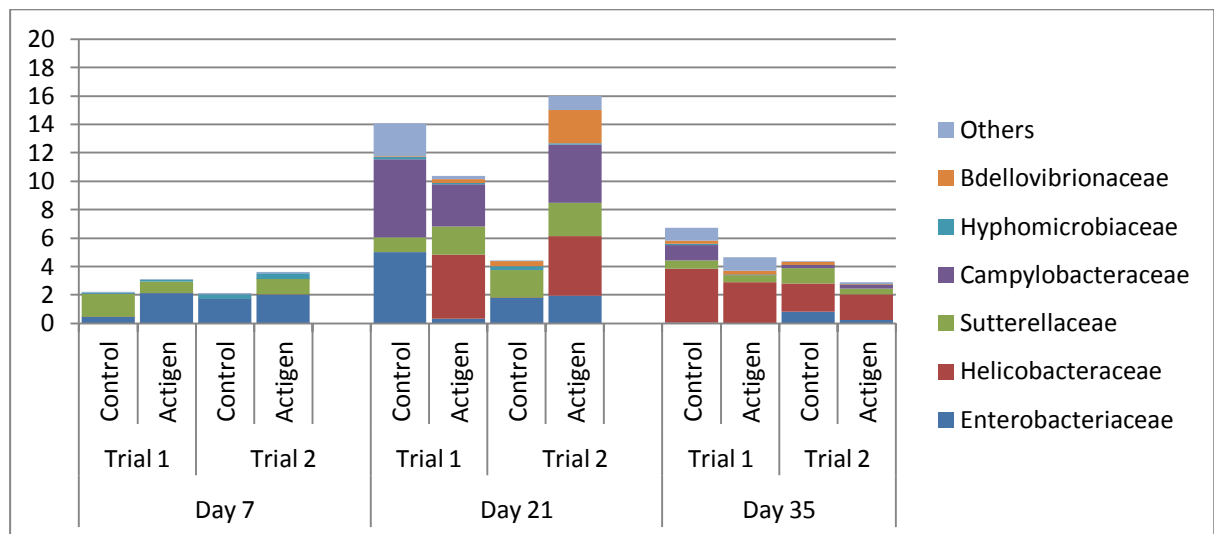

19

20

**Figure S5.** Bacterial Family level distribution(percentage) within Proteobacteria phylum

21

at each timepoint in control and supplemented groups for both Trial 1 and Trial 2, (n=12

22

for each treatment per timepoint).

23
